# Supplementary material for: Combining Computational Screening and Machine Learning to Predict Metal–Organic Framework Adsorbents and Membranes for Removing CH4 or H2 from Air
Source: MDPI journal article supplement (doi:10.3390/membranes12090830), 2022-08-25
Supplement: s1 [file s1]

# Supplementary Materials

Combining computational screening and machine learning to predict metal–organic framework adsorbents and membranes for removing CH<sub>4</sub> or H<sub>2</sub> from air

Huilin Li <sup>1</sup>, Cuimiao Wang <sup>1</sup>, Yue Zeng <sup>1</sup>, Dong Li <sup>1</sup>, Yaling Yan <sup>1,\*</sup>, Xin Zhu <sup>1,\*</sup> and Zhiwei Qiao <sup>1,2,\*</sup>

1 Guangzhou Key Laboratory for New Energy and Green Catalysis, School of Chemistry and Chemical Engineering, Guangzhou University, Guangzhou 510006, China

2 Joint Institute of Guangzhou University & Institute of Corrosion Science and Technology, Guangzhou University, Guangzhou 510006, China

Correspondence: zqiao@gzhu.edu.cn; yaling@gzhu.edu.cn; zhux@gzhu.edu.cn.

## Table Contents

|                                                                                                   |     |
|---------------------------------------------------------------------------------------------------|-----|
| Table S1 Lennard–Jones parameters of MOFs                                                         | S2  |
| Table S2 Lennard–Jones parameters and charges of adsorbates                                       | S3  |
| Table S3 Kinetic diameter of CH <sub>4</sub> , N <sub>2</sub> , O <sub>2</sub> and H <sub>2</sub> | S3  |
| Table S4 The constraints for screening the best MOFs/MOFMs under each system                      | S12 |
| Table S5 Design Strategies of MOFs and MOFMs with high performance                                | S12 |

## Figure Contents

|                                                                                                                                            |     |
|--------------------------------------------------------------------------------------------------------------------------------------------|-----|
| Figure S1 The relationship between the descriptors of MOFs with adsorbents performance in CH <sub>4</sub> /N <sub>2</sub> +O <sub>2</sub>  | S4  |
| Figure S2 The relationship between the descriptors of MOFs with adsorbents performance in H <sub>2</sub> /N <sub>2</sub> +O <sub>2</sub>   | S5  |
| Figure S3 The relationship between the descriptors of MOFMs with adsorbents performance in CH <sub>4</sub> /N <sub>2</sub> +O <sub>2</sub> | S6  |
| Figure S4 The relationship between the descriptors of MOFMs with adsorbents performance in H <sub>2</sub> /N <sub>2</sub> +O <sub>2</sub>  | S7  |
| Figure S5 Diffusion coefficient <i>D</i> and Permeability <i>P</i> versus PLD for N <sub>2</sub> and O <sub>2</sub> in 6013 CORE-MOFs      | S8  |
| Figure S6 Tree-based pipeline optimization tool                                                                                            | S9  |
| Figure S7 Decision tree                                                                                                                    | S9  |
| Figure S8 Random forest                                                                                                                    | S10 |
| Figure S9 k-fold cross validation                                                                                                          | S11 |

## Others

|                                        |     |
|----------------------------------------|-----|
| Machine learning methods               | S9  |
| <i>k</i> -fold cross validation        | S11 |
| Evaluation indicators of ML algorithms | S11 |
| References                             | S27 |

**Table S1.** Lennard-Jones parameters of MOFs[1].

| Atom | $\varepsilon/k_B$ [K] | $\sigma$ [Å] | Atom | $\varepsilon/k_B$ [K] | $\sigma$ [Å] | Atom | $\varepsilon/k_B$ [K] | $\sigma$ [Å] |
|------|-----------------------|--------------|------|-----------------------|--------------|------|-----------------------|--------------|
| Ac   | 16.60                 | 3.10         | Ge   | 190.69                | 3.81         | Po   | 163.52                | 4.20         |
| Ag   | 18.11                 | 2.80         | Gd   | 4.53                  | 3.00         | Pr   | 5.03                  | 3.21         |
| Al   | 254.09                | 4.01         | H    | 22.14                 | 2.57         | Pt   | 40.25                 | 2.45         |
| Am   | 7.04                  | 3.01         | Hf   | 36.23                 | 2.80         | Pu   | 8.05                  | 3.05         |
| Ar   | 93.08                 | 3.45         | Hg   | 193.71                | 2.41         | Ra   | 203.27                | 3.28         |
| As   | 155.47                | 3.77         | Ho   | 3.52                  | 3.04         | Rb   | 20.13                 | 3.67         |
| At   | 142.89                | 4.23         | I    | 170.57                | 4.01         | Re   | 33.21                 | 2.63         |
| Au   | 19.62                 | 2.93         | In   | 301.39                | 3.98         | Rh   | 26.67                 | 2.61         |
| B    | 90.57                 | 3.64         | Ir   | 36.73                 | 2.53         | Rn   | 124.78                | 4.25         |
| Ba   | 183.15                | 3.30         | K    | 17.61                 | 3.40         | Ru   | 28.18                 | 2.64         |
| Be   | 42.77                 | 2.45         | Kr   | 110.69                | 3.69         | S    | 137.86                | 3.59         |
| Bi   | 260.63                | 3.89         | La   | 8.55                  | 3.14         | Sb   | 225.91                | 3.94         |
| Bk   | 6.54                  | 2.97         | Li   | 12.58                 | 2.18         | Sc   | 9.56                  | 2.94         |
| Br   | 126.29                | 3.73         | Lu   | 20.63                 | 3.24         | Se   | 146.42                | 3.75         |
| C    | 52.83                 | 3.43         | Lr   | 5.53                  | 2.88         | Si   | 202.27                | 3.83         |
| Ca   | 119.75                | 3.03         | Md   | 5.53                  | 2.92         | Sm   | 4.03                  | 3.14         |
| Cd   | 114.72                | 2.54         | Mg   | 55.85                 | 2.69         | Sn   | 285.28                | 3.91         |
| Ce   | 6.54                  | 3.17         | Mn   | 6.54                  | 2.64         | Sr   | 118.24                | 3.24         |
| Cf   | 6.54                  | 2.95         | Mo   | 28.18                 | 2.72         | Ta   | 40.75                 | 2.82         |
| Cl   | 114.21                | 3.52         | N    | 34.72                 | 3.26         | Tb   | 3.52                  | 3.07         |
| Cm   | 6.54                  | 2.96         | Na   | 15.09                 | 2.66         | Tc   | 24.15                 | 2.67         |
| Co   | 7.04                  | 2.56         | Ne   | 21.13                 | 2.66         | Te   | 200.25                | 3.98         |
| Cr   | 7.55                  | 2.69         | Nb   | 29.69                 | 2.82         | Th   | 13.08                 | 3.03         |
| Cu   | 2.52                  | 3.11         | Nd   | 5.03                  | 3.18         | Ti   | 8.55                  | 2.83         |
| Cs   | 22.64                 | 4.02         | No   | 5.53                  | 2.89         | Tl   | 342.14                | 3.87         |
| Dy   | 3.52                  | 3.05         | Ni   | 7.55                  | 2.52         | Tm   | 3.02                  | 3.01         |
| Eu   | 4.03                  | 3.11         | Np   | 9.56                  | 3.05         | U    | 11.07                 | 3.02         |
| Er   | 3.52                  | 3.02         | O    | 30.19                 | 3.12         | V    | 8.05                  | 2.80         |
| Es   | 6.04                  | 2.94         | Os   | 18.62                 | 2.78         | W    | 33.71                 | 2.73         |
| F    | 25.16                 | 3.00         | P    | 153.46                | 3.69         | Xe   | 167.04                | 3.92         |
| Fe   | 6.54                  | 2.59         | Pa   | 11.07                 | 3.05         | Y    | 36.23                 | 2.98         |
| Fm   | 6.04                  | 2.93         | Pb   | 333.59                | 3.83         | Yb   | 114.72                | 2.99         |
| Fr   | 25.16                 | 4.37         | Pd   | 24.15                 | 2.58         | Zn   | 62.39                 | 2.46         |
| Ga   | 208.81                | 3.90         | Pm   | 4.53                  | 3.16         | Zr   | 34.72                 | 2.78         |

**Table S2.** Lennard-Jones parameters and charges of adsorbates[2-5].

| Atom             | $\epsilon/k_B$ [K] | $\sigma$ [Å] | Charge (e) |
|------------------|--------------------|--------------|------------|
| CH <sub>4</sub>  | 151.16             | 3.7314       |            |
| H <sub>2</sub>   | 24.692             | 3.0292       |            |
| N_N <sub>2</sub> | 36.0               | 3.31         | -0.484     |
| N_com            | 0                  | 0            | +0.964     |
| O_O <sub>2</sub> | 49.0               | 3.02         | +0.113     |
| O_com            | 0                  | 0            | -0.226     |

**Table S3.** Kinetic diameter of CH<sub>4</sub>, N<sub>2</sub>, O<sub>2</sub> and H<sub>2</sub>.

| Gas                  | CH <sub>4</sub> | N <sub>2</sub> | O <sub>2</sub> | H <sub>2</sub> |
|----------------------|-----------------|----------------|----------------|----------------|
| Kinetic diameter (Å) | 3.76            | 3.64           | 3.47           | 2.89           |

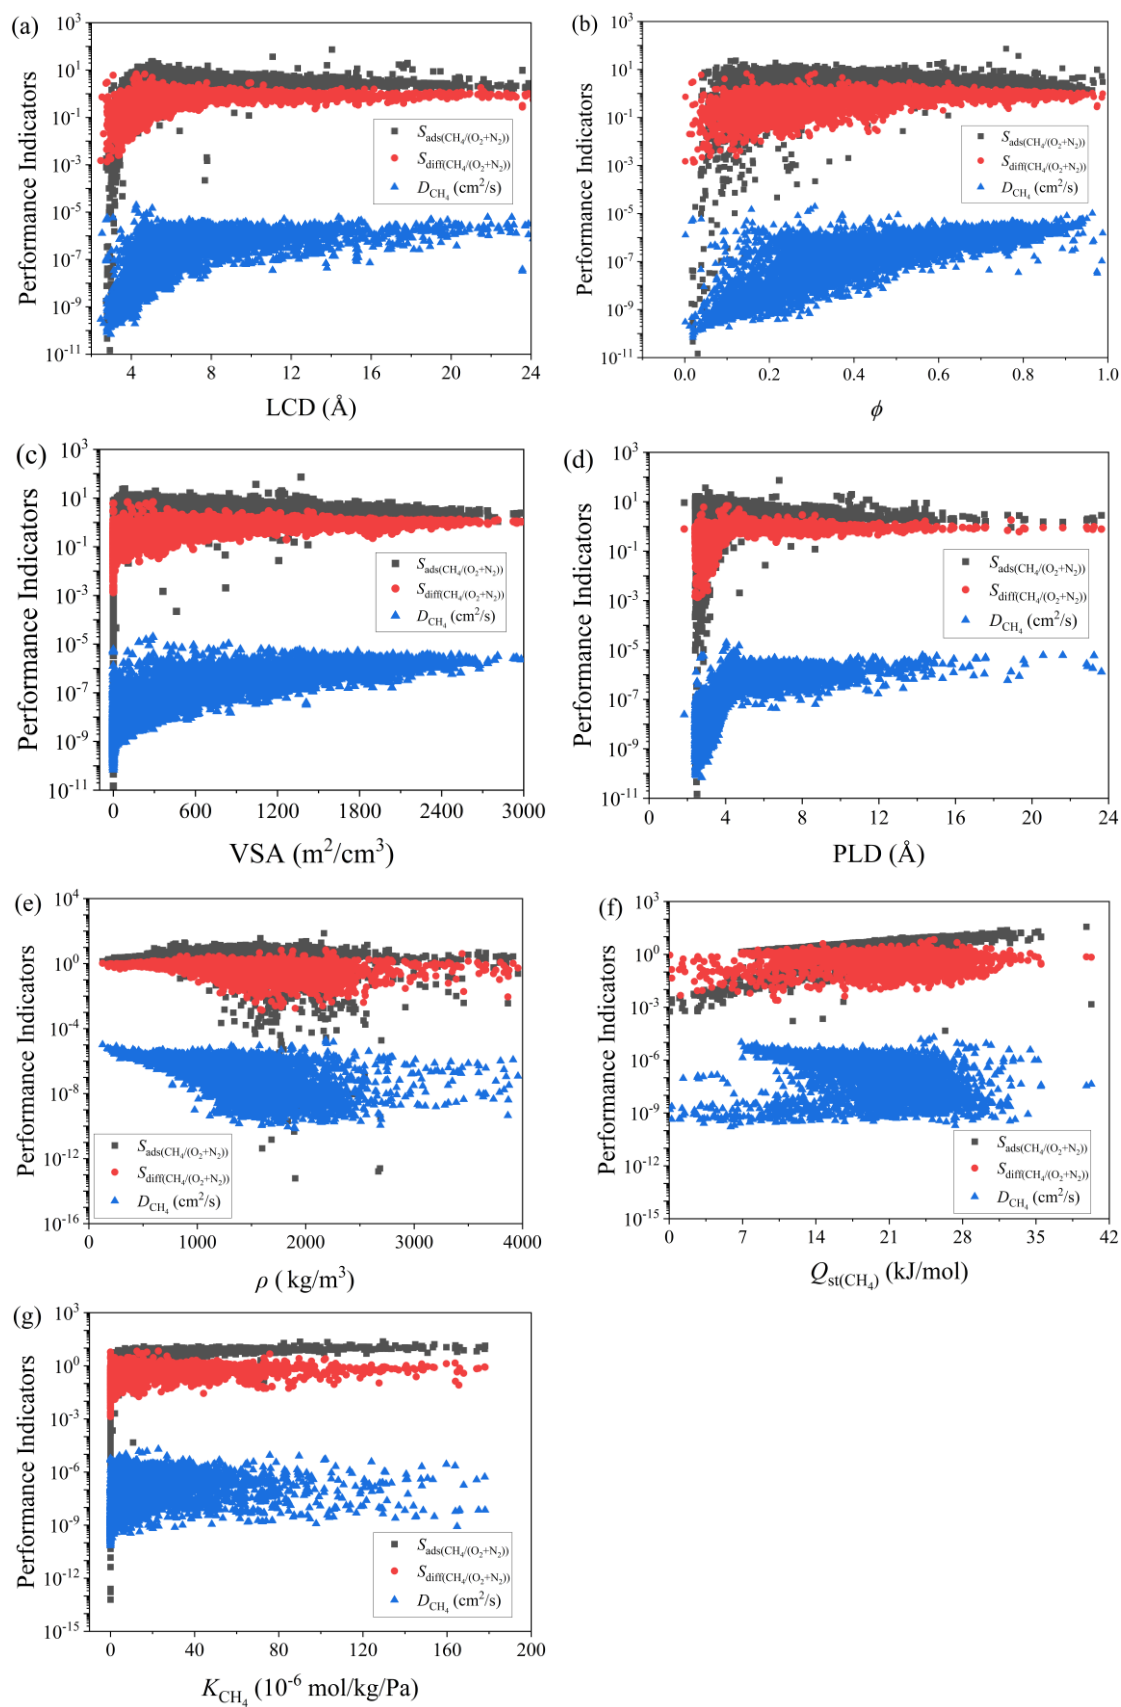

**Figure S1.** The relationship between seven descriptors (LCD,  $\phi$ , VSA, PLD,  $\rho$ ,  $Q_{\text{st}}^0(\text{CH}_4)$  and  $K_{\text{CH}_4}$ ) of MOFs and three performance indexes ( $D_{\text{CH}_4}$ ,  $S_{\text{ads}}(\text{CH}_4/\text{O}_2+\text{N}_2)$  and  $S_{\text{diff}}(\text{CH}_4/\text{O}_2+\text{N}_2)$ ).

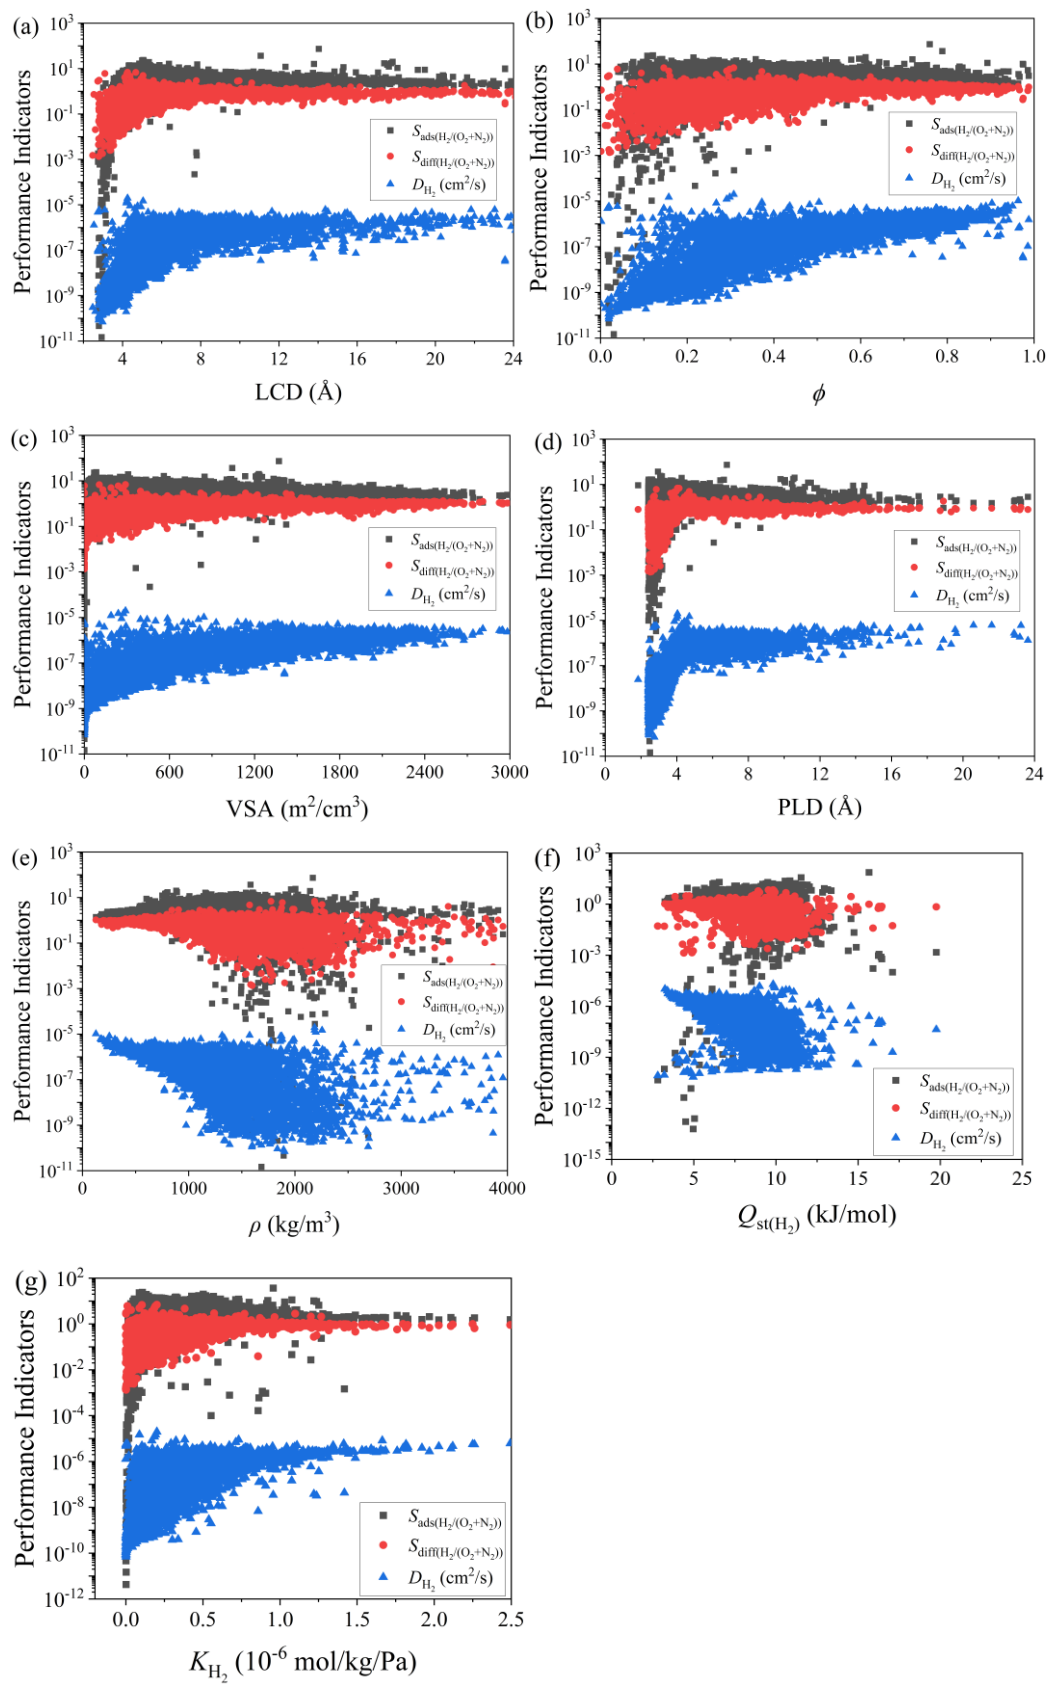

**Figure S2.** The relationship between seven descriptors (LCD,  $\phi$ , VSA, PLD,  $\rho$ ,  $Q_{\text{st(H}_2\text{)}}$  and  $K_{\text{H}_2}$ ) of MOFs and three performance indexes ( $D_{\text{H}_2}$ ,  $S_{\text{ads(H}_2\text{/O}_2\text{+N}_2\text{)}}$  and  $S_{\text{diff(H}_2\text{/O}_2\text{+N}_2\text{)}}$ ).

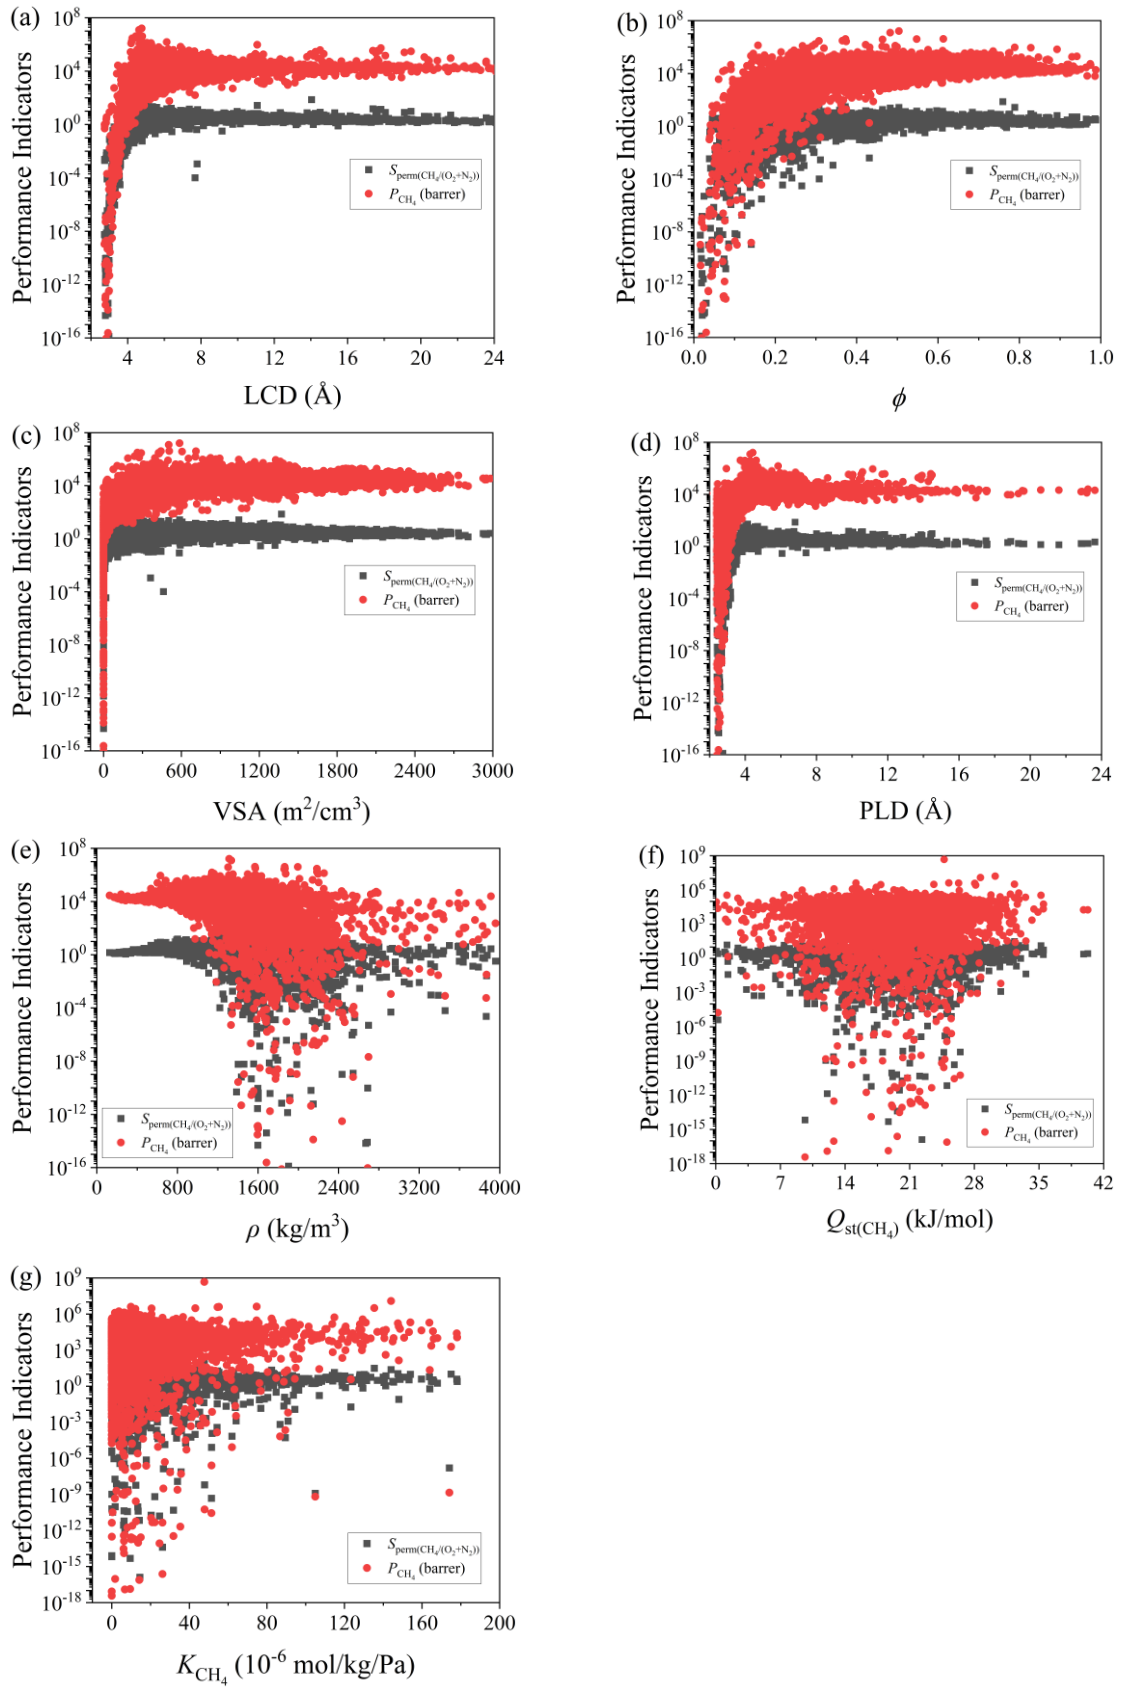

**Figure S3.** The relationship between seven descriptors (LCD,  $\phi$ , VSA, PLD,  $\rho$ ,  $Q_{\text{st}(\text{CH}_4)}^0$  and  $K_{\text{CH}_4}$ ) of MOFMs and two performance indexes ( $P_{\text{CH}_4}$  and  $S_{\text{perm}(\text{CH}_4/\text{O}_2+\text{N}_2)}$ ).

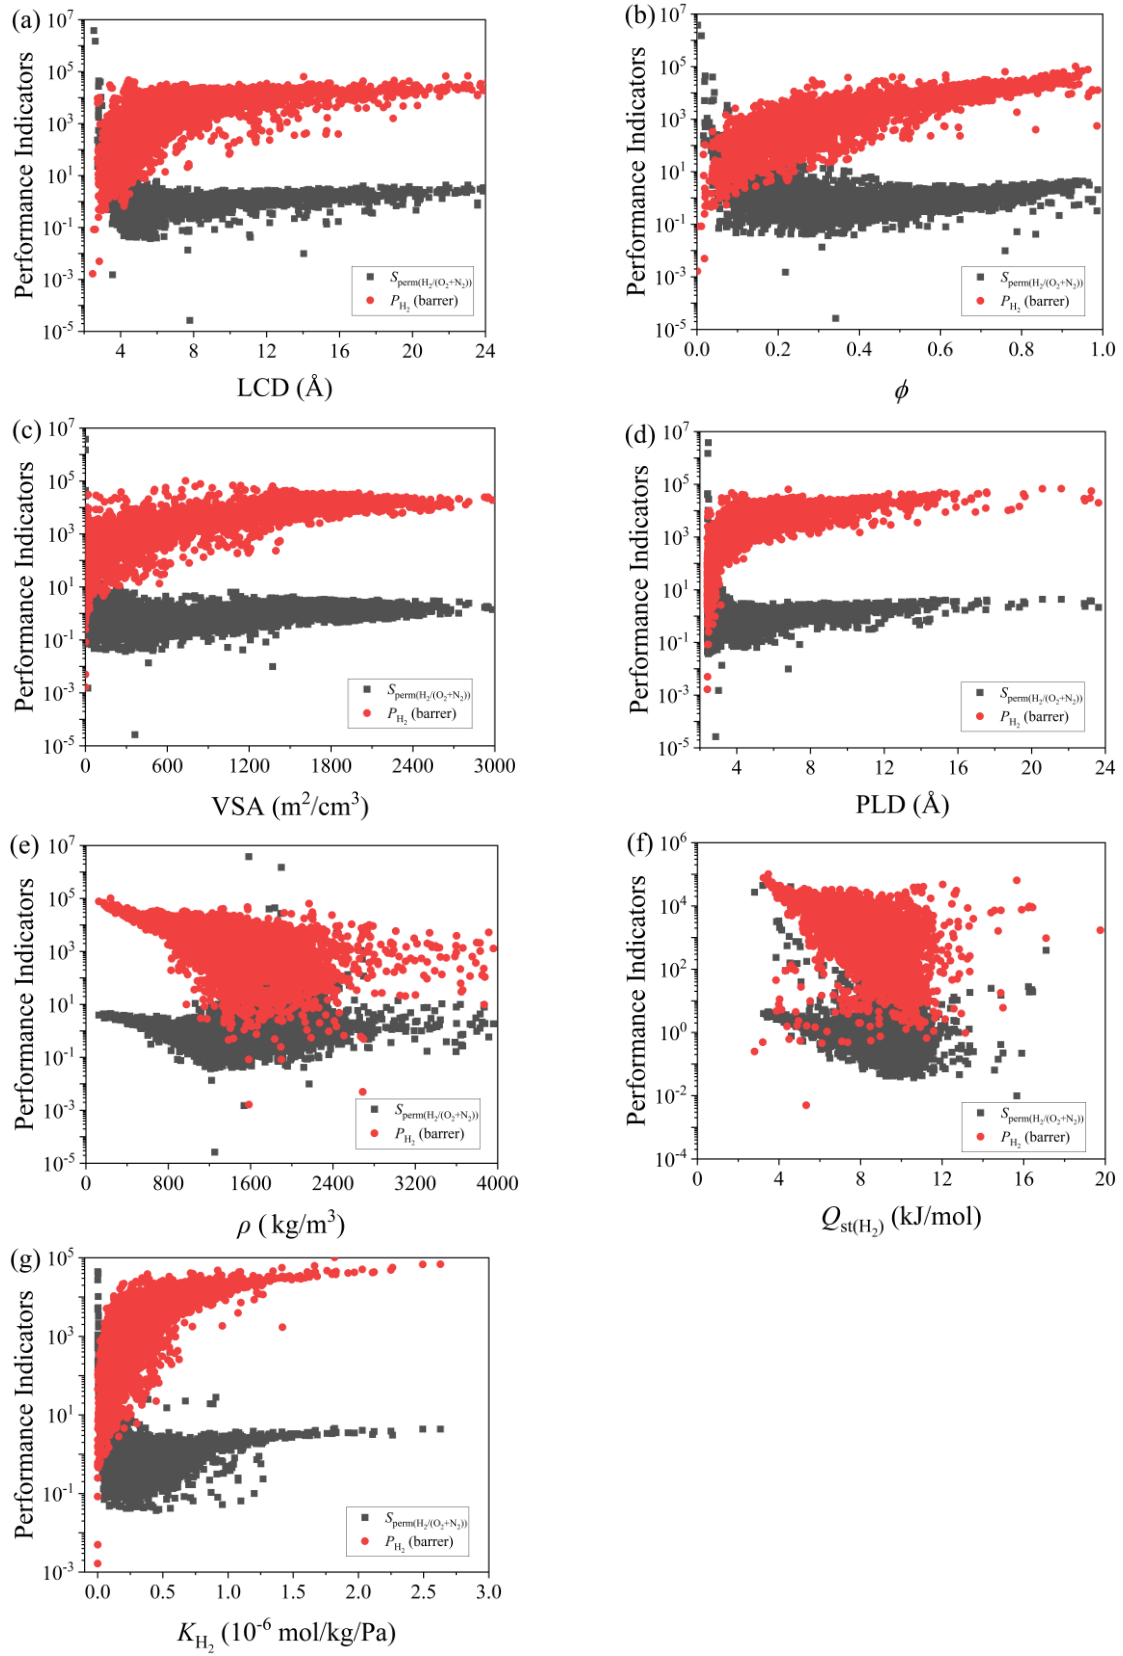

**Figure S4.** The relationship between seven descriptors (LCD,  $\phi$ , VSA, PLD,  $\rho$ ,  $Q_{st}(H_2)$  and  $K_{H_2}$ ) of MOFMs and two performance indexes ( $P_{H_2}$  and  $S_{perm}(H_2/O_2+N_2)$ ).

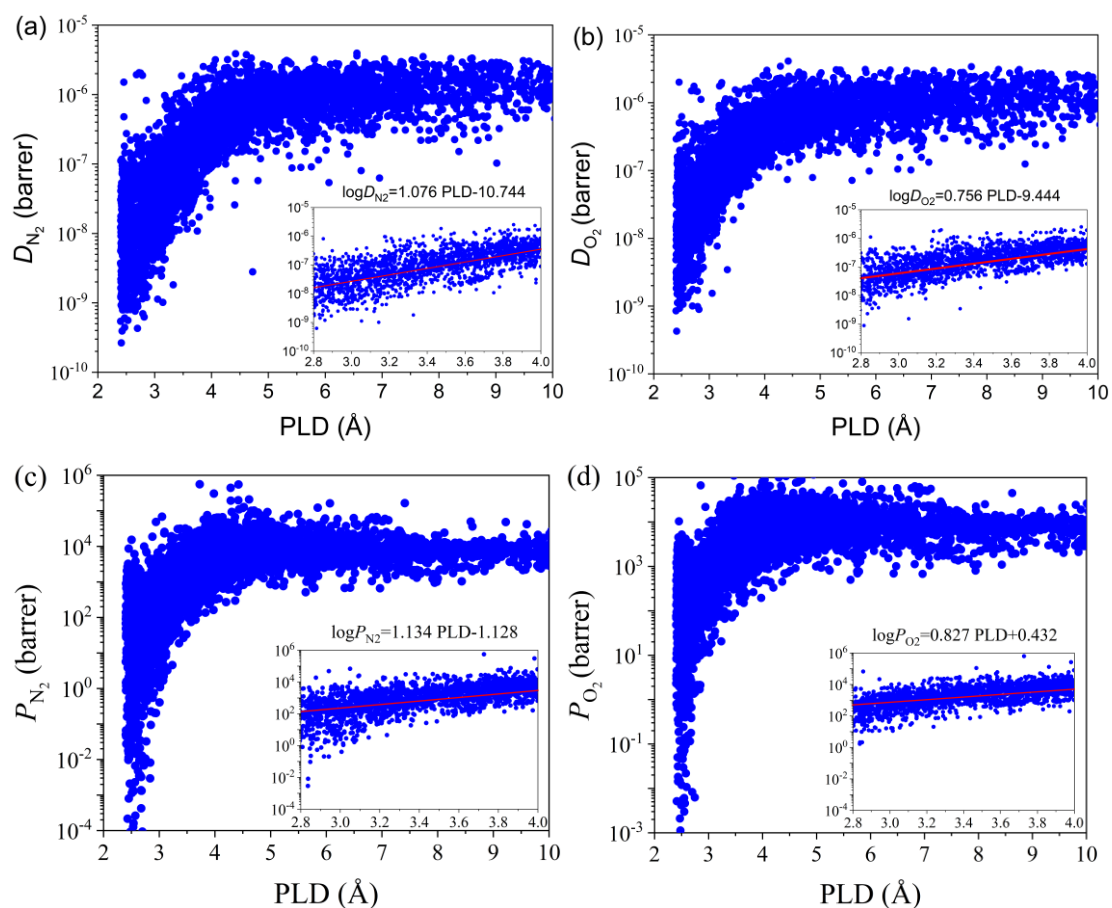

Figure S5. Diffusion coefficient  $D$  and Permeability  $P$  versus PLD for N<sub>2</sub> and O<sub>2</sub> in 6013 CORE-MOFs.



## Machine learning methods

### Tree-based pipeline optimization tool

Tree-based pipeline optimization tool (TPOT) is a great Python automated machine learning tool that uses genetic algorithms to programmatically optimize ML pipelines for automated feature selection and model selection. The tool enables automatic model generation to implement prediction tasks for classification or regression. TPOT will automate the most tedious parts of machine learning by intelligently exploring thousands of possible pipelines to find the one that best suits the target task. TPOT automates feature selection, feature preprocessing, feature construction, model selection, and parameter tuning. It's even possible to intelligently explore thousands of possible pipelines to automate the most tedious parts of machine learning to find the one that best fits the target task. Once the search is complete, it will also output a Python code pipeline that can run independently for subsequent optimization and learning. The model schematic is shown in Figure S6.

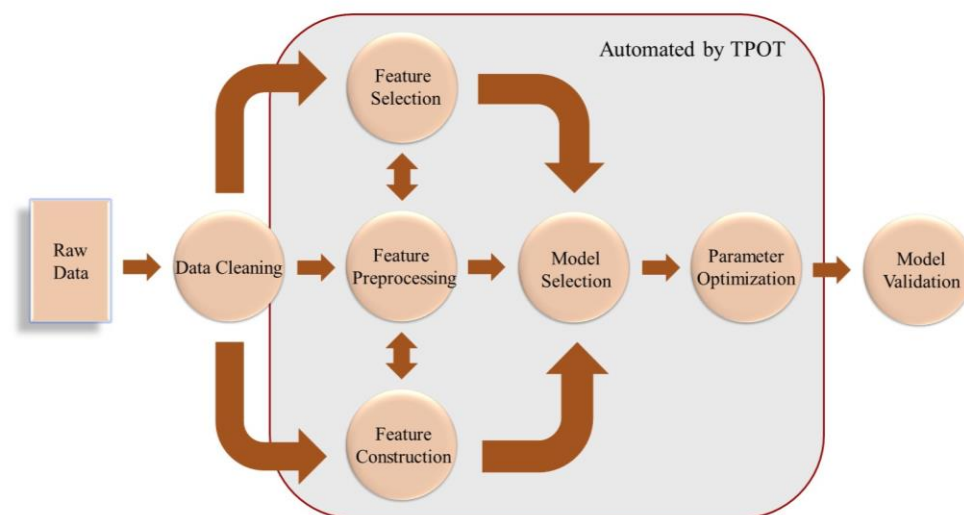

**Figure S6.** Tree-based pipeline optimization tool

### Decision tree

Decision tree (DT) are a method of supervised learning that can be used for both classification and regression. On the DT nodes, eigenvalues are selected from the most important to the next important. The calculations are tried for each eigenvalue by a DT algorithm, and then the optimal classification is defined as the parent node after considering the attribution of each feature. Furthermore, the independent variable  $X_i$  is divided into two or more groups according to a certain splitting criterion. A tree is created through a plurality of splitting nodes. The most common DT algorithm is the binary branching principle, as shown in Figure S7. The independent variable  $X_i$  starts from the root node and is divided into two, and the DT is finally ended when it reaches the leaf nodes. The DT is created by an optimal splitting criterion. If the splitting criterion can make the dependent variable  $Y_i$  as a test set be the same as the calculated  $Y_i'$  in the leaf nodes, or within a specified error range, the calculated  $Y_i'$  are the output by DT.

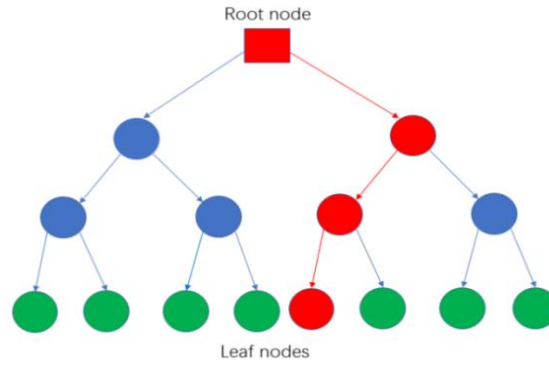

**Figure S7.** Decision tree.

### Random forest

Random forest (RF) is also one of the most commonly used algorithms because it is simple and can be used for both classification and regression. It is an integrated algorithm based on the bagging approach, which refers to a model that uses multiple decision trees to train and predict samples. It contains multiple decision tree models, each of which grows well and continuously splits as input sample prediction. The new sample will be input to each decision tree with leaf nodes, and the final consequence is the mean value of each tree prediction result. The results of the whole model have high precision and generalization performance. Random forest is a flexible and easy-to-use machine learning algorithm that can get good results in most cases, even without hyperparameter tuning. We set up 200 trees in Figure S8.

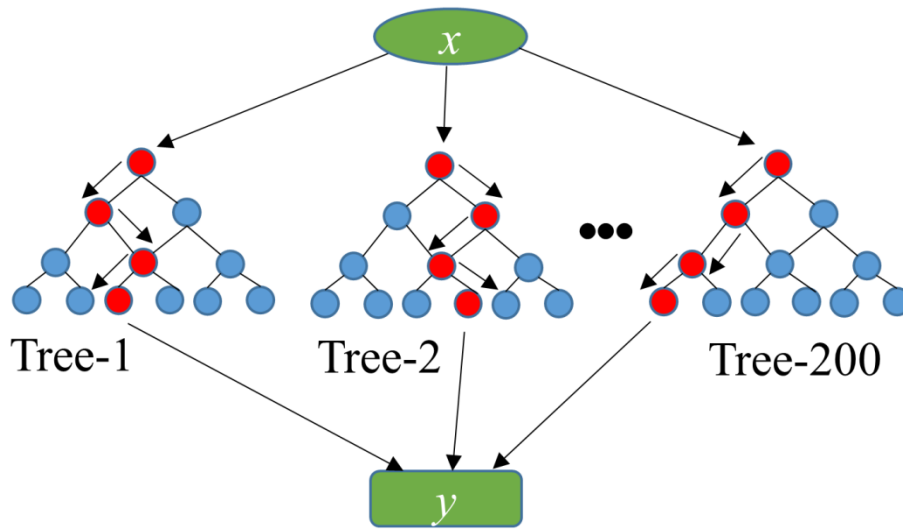

**Figure S8.** Random forest.

### ***k*-fold Cross Validation**

In general, *k*-fold cross validation is used for model tuning to find the hyperparameters that makes the model generalization performance optimal. After the model is found, the model is retrained on all training sets, and the test set is used to make the final evaluation on the model performance, as shown in Figure S13. The so-called *k*-fold cross validation is to divide the data set into *k* parts (*k* =5) in equal proportion, namely, the training set (including the validation set) and the test set. One of them is used to validate the resulting model, and the *k* -1 of folded data are used to train the model. Finally, the parameter with the lowest average error is selected for each parameter.

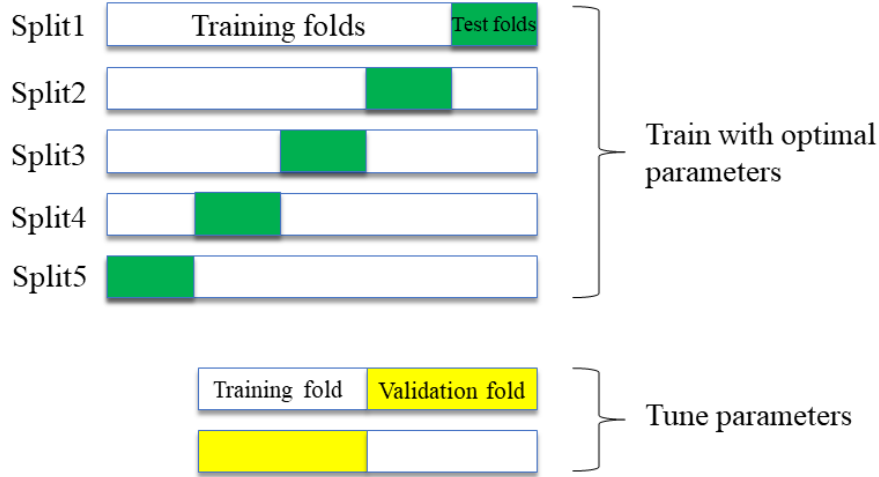

**Figure S9.** The diagram of *k*-fold cross-validation

### **Evaluation indicators of ML algorithms**

Evaluation indicators can reflect the difference between the actual value and predicted value. Several evaluation indicators are widely used for regression models, e.g., mean absolute error (MAE), root-mean-square error (RMSE), and *R*, as calculated in equations S (1) - (3), where  $x_i$  is the GCMC simulated value,  $y_i$  is the value ML predicted, *n* is number of MOFs, and  $\bar{y}$  is the average of the ML predicted values.

$$\text{MAE} = \frac{1}{n} \sum_{i=1}^n |x_i - y_i| \quad \text{S (1)}$$

$$\text{RMSE} = \frac{1}{n} \sum_{i=1}^n (x_i - y_i)^2 \quad \text{S (2)}$$

$$R = \sqrt{1 - \frac{\sum_{i=1}^n (x_i - y_i)^2}{\sum_{i=1}^n (y_i - \bar{y})^2}} \quad \text{S (3)}$$

**Table S4.** The constraints for screening the best MOFs/MOFMs under each system.

| Applications |                          | CH <sub>4</sub> /O <sub>2</sub> +N <sub>2</sub> | H <sub>2</sub> /O <sub>2</sub> +N <sub>2</sub> |
|--------------|--------------------------|-------------------------------------------------|------------------------------------------------|
| MOFs         | $D$ (cm <sup>2</sup> /s) | 10 <sup>-6</sup>                                | 10 <sup>-6</sup>                               |
|              | $S_{\text{ads}}$         | 5                                               | 5                                              |
|              | $S_{\text{diff}}$        | 4                                               | 10                                             |
| MOFMs        | $P$ (barrer)             | 3000000                                         | 5000                                           |
|              | $S_{\text{perm}}$        | 20                                              | 16                                             |

**Table S5.** Design Strategies of MOFs and MOFMs with high performance

| No. | CSD                 | Design types |       |                                              |                                                                                             | The percentage of $S_{\text{ads}}(\text{CH}_4/\text{O}_2+\text{N}_2)$ increased | The percentage of $S_{\text{diff}}(\text{CH}_4/\text{O}_2+\text{N}_2)$ increased | The percentage of $D_{\text{CH}_4}$ increased | The percentage of $P_{\text{CH}_4}$ increased | The percentage of $S_{\text{perm}}(\text{CH}_4/\text{O}_2+\text{N}_2)$ increased |
|-----|---------------------|--------------|-------|----------------------------------------------|---------------------------------------------------------------------------------------------|---------------------------------------------------------------------------------|----------------------------------------------------------------------------------|-----------------------------------------------|-----------------------------------------------|----------------------------------------------------------------------------------|
|     |                     |              | Metal | Linker                                       | Topology                                                                                    |                                                                                 |                                                                                  |                                               |                                               |                                                                                  |
| 1   | PARHEW <sup>a</sup> | Topology     | Cd    | C <sub>9</sub> H <sub>6</sub> O <sub>6</sub> | rtl<br>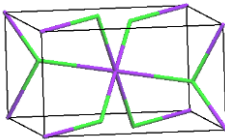 | 55.43%                                                                          | 42.12%                                                                           | 79.39%                                        | 57.37%                                        | 120.91%                                                                          |

|   |                       |  |    |                                                                                                   |                                                                                            |        |        |         |          |        |
|---|-----------------------|--|----|---------------------------------------------------------------------------------------------------|--------------------------------------------------------------------------------------------|--------|--------|---------|----------|--------|
|   | MITGUR01 <sup>b</sup> |  |    | 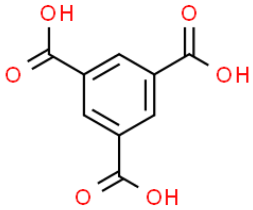                 | <br>mmm  |        |        |         |          |        |
| 2 | VEJYIT <sup>a</sup>   |  | Zn | $C_3H_4N_2$<br> | <br>crb  | 44.18% | 12.64% | 516.52% | 1789.10% | 62.68% |
|   | IMIDZB10 <sup>b</sup> |  |    |                                                                                                   | <br>sod |        |        |         |          |        |

|   |                               |  |    |                                                                                                     |                                                                                         |         |        |         |         |         |
|---|-------------------------------|--|----|-----------------------------------------------------------------------------------------------------|-----------------------------------------------------------------------------------------|---------|--------|---------|---------|---------|
| 3 | cg300979c_si_002 <sup>a</sup> |  | Mn | $C_9H_6O_6$ 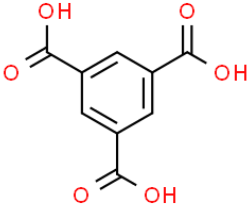       | pyr   | -10.52% | 23.79% | 262.88% | 454.09% | 9.20%   |
|   | DAPBIH <sup>b</sup>           |  |    |                                                                                                     | tbo   |         |        |         |         |         |
| 4 | CAXZOS <sup>a</sup>           |  | Co | $C_{12}H_9NO_2$  | dia  | 30.53%  | 91.72% | 217.40% | 241.14% | 156.68% |

|   |                     |        |    |                                                                                                      |                                                                                     |        |        |        |         |        |
|---|---------------------|--------|----|------------------------------------------------------------------------------------------------------|-------------------------------------------------------------------------------------|--------|--------|--------|---------|--------|
|   | ZILBED <sup>b</sup> |        |    | 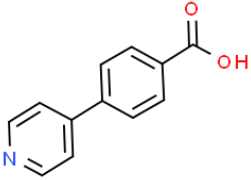                    |   |        |        |        |         |        |
| 5 | OSAVEK <sup>a</sup> | Linker | Ca | $C_8H_6O_6$<br>     |  | 16.50% | 22.17% | 58.20% | 238.08% | 43.75% |
|   | PARFOF <sup>b</sup> |        |    | $C_6H_{10}O_4$<br> |                                                                                     |        |        |        |         |        |

|   |                       |  |    |                                                                                                         |                                                                                            |        |         |          |         |         |
|---|-----------------------|--|----|---------------------------------------------------------------------------------------------------------|--------------------------------------------------------------------------------------------|--------|---------|----------|---------|---------|
| 6 | BEDHOJ <sup>a</sup>   |  | Ni | $C_8H_6N_2O_2$<br>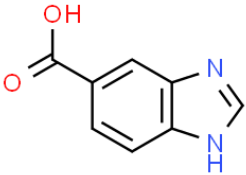     | <br>dia  | 38.11% | 175.37% | 3234.62% | 84.37%  | 281.02% |
|   | UFATEA01 <sup>b</sup> |  |    | $C_6H_5NO_2$<br>       |                                                                                            |        |         |          |         |         |
| 7 | ZISYAD <sup>a</sup>   |  | Cu | $C_{45}H_{32}N_4$<br> | <br>dia | 5.28%  | 43.84%  | 122.42%  | 244.48% | 50.92%  |



|   |                               |       |    |                                                                                                  |                                                                                         |        |        |        |         |         |
|---|-------------------------------|-------|----|--------------------------------------------------------------------------------------------------|-----------------------------------------------------------------------------------------|--------|--------|--------|---------|---------|
|   | ja5069855_si_002 <sup>b</sup> |       |    | $C_9H_7N_3O_2$ 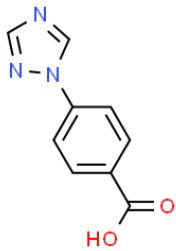 |                                                                                         |        |        |        |         |         |
| 8 | PEPLIG <sup>a</sup>           | Metal | V  | $C_8H_6O_4$    | rna  | 42.83% | 44.22% | 61.39% | 293.00% | 107.93% |
|   | jp102463p_si_002 <sup>b</sup> |       | Cr |                                                                                                  |                                                                                         |        |        |        |         |         |

|    |                     |  |       |                                                                                                        |                                                                                     |        |        |         |         |        |
|----|---------------------|--|-------|--------------------------------------------------------------------------------------------------------|-------------------------------------------------------------------------------------|--------|--------|---------|---------|--------|
| 9  | SACDOR <sup>a</sup> |  | Zn    | $C_{18}H_{12}N_6$<br>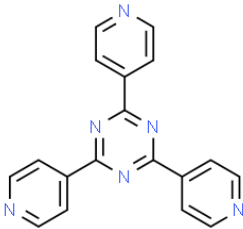 |   | -5.89% | 85.28% | 128.79% | 167.43% | 77.63% |
|    | SETPEO <sup>b</sup> |  | In    |                                                                                                        |                                                                                     |        |        |         |         |        |
| 10 | FOHCIP <sup>a</sup> |  | Cd,Hg | $SCNH$<br>$S = C = NH$                                                                                 |  | 4.64%  | 27.64% | 26.63%  | 52.93%  | 33.95% |

|     | XADGAM <sup>b</sup> |              | Mn,Hg |                                                                                                                       |                                                                                            |                                                                                |                                                                                 |                                              |                                              |                                                                                 |
|-----|---------------------|--------------|-------|-----------------------------------------------------------------------------------------------------------------------|--------------------------------------------------------------------------------------------|--------------------------------------------------------------------------------|---------------------------------------------------------------------------------|----------------------------------------------|----------------------------------------------|---------------------------------------------------------------------------------|
| No. | CSD                 | Design types |       |                                                                                                                       |                                                                                            | The percentage of $S_{\text{ads}}(\text{H}_2/\text{O}_2+\text{N}_2)$ increased | The percentage of $S_{\text{diff}}(\text{H}_2/\text{O}_2+\text{N}_2)$ increased | The percentage of $D_{\text{H}_2}$ increased | The percentage of $P_{\text{H}_2}$ increased | The percentage of $S_{\text{perm}}(\text{H}_2/\text{O}_2+\text{N}_2)$ increased |
|     |                     |              | Metal | Linker                                                                                                                | Topology                                                                                   |                                                                                |                                                                                 |                                              |                                              |                                                                                 |
| 11  | GUPBUP <sup>a</sup> | Topology     | Cd    | $\text{C}_4\text{H}_6\text{N}_2$<br>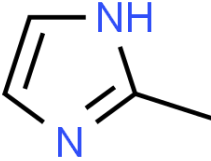 | sod<br> | 182.78%                                                                        | -7.03%                                                                          | 170.08%                                      | 503.81%                                      | 166.30%                                                                         |

|    |                       |  |    |                                                                                                                                        |                                                                                                    |        |         |         |         |         |
|----|-----------------------|--|----|----------------------------------------------------------------------------------------------------------------------------------------|----------------------------------------------------------------------------------------------------|--------|---------|---------|---------|---------|
|    | GUPBOJ01 <sup>b</sup> |  |    |                                                                                                                                        | <div>ict</div> 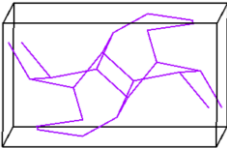  |        |         |         |         |         |
| 12 | XAZGEK <sup>a</sup>   |  | Ag | <div>C<sub>6</sub>H<sub>12</sub>N<sub>4</sub></div>  | <div>mog</div>   | 99.48% | 143.40% | 490.68% | 657.25% | 378.40% |
|    | BAHMAZ <sup>b</sup>   |  |    |                                                                                                                                        | <div>hcb</div>  |        |         |         |         |         |

|    |                     |        |    |                                                                                                        |                                                                                            |         |         |         |          |        |
|----|---------------------|--------|----|--------------------------------------------------------------------------------------------------------|--------------------------------------------------------------------------------------------|---------|---------|---------|----------|--------|
| 13 | XIGHIF <sup>a</sup> |        | Zn | $C_{18}H_{12}N_6$<br>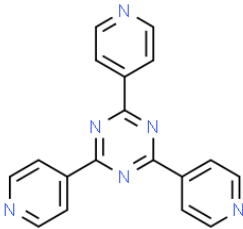 | ths<br>  | 28.32%  | 6.26%   | 85.94%  | 53.93%   | 36.29% |
|    | SOMCON <sup>b</sup> |        |    |                                                                                                        | srs<br>  |         |         |         |          |        |
| 14 | PARHAS <sup>a</sup> | Linker | Ca | $C_6H_{10}O_4$<br>   | dmd<br> | -44.12% | 175.99% | 446.30% | 1683.03% | 30.60% |

|    |                     |  |    |                                                                                                        |                                                                                         |        |       |         |         |        |
|----|---------------------|--|----|--------------------------------------------------------------------------------------------------------|-----------------------------------------------------------------------------------------|--------|-------|---------|---------|--------|
|    | LEZZEX <sup>b</sup> |  |    | $C_8H_{12}O_4$ 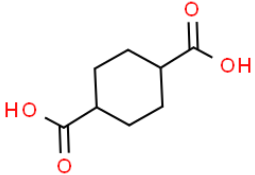       |                                                                                         |        |       |         |         |        |
| 15 | QOZSIJ <sup>a</sup> |  | Zn | $C_{35}H_{23}N_3O_4$  | ths  | 47.38% | 7.51% | 173.53% | 301.08% | 60.19% |
|    | LUCDOE <sup>b</sup> |  |    | $C_{18}H_{12}N_6$    |                                                                                         |        |       |         |         |        |

|    |                     |       |    |                                                                                                   |                                                                                           |         |        |        |         |         |
|----|---------------------|-------|----|---------------------------------------------------------------------------------------------------|-------------------------------------------------------------------------------------------|---------|--------|--------|---------|---------|
| 16 | FUSWIA <sup>a</sup> |       | Cu | $C_6H_4N_5$<br>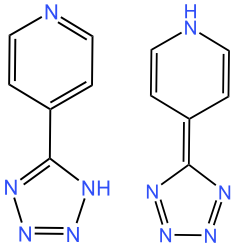  | <br>bcu | 297.28% | 21.24% | 73.36% | 34.53%  | 382.40% |
|    | HAWZEM <sup>b</sup> |       |    | $C_6H_5O_2N$<br> |                                                                                           |         |        |        |         |         |
| 17 | PIBPIA <sup>a</sup> | Metal | Zn | $C_8H_6O_4$                                                                                       | bcg                                                                                       | 63.47%  | 27.63% | 71.57% | 114.93% | 106.77% |

|    |                       |  |    |                                                                                                                                   |                                                                                     |         |        |         |         |         |
|----|-----------------------|--|----|-----------------------------------------------------------------------------------------------------------------------------------|-------------------------------------------------------------------------------------|---------|--------|---------|---------|---------|
|    | VEGMIE01 <sup>b</sup> |  | Co | 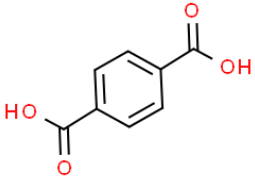                                                 |   |         |        |         |         |         |
| 18 | FUTCAZ <sup>a</sup>   |  | Mn | <p>C<sub>9</sub>H<sub>6</sub>O<sub>6</sub></p>  |  | 160.71% | 37.18% | 136.66% | 207.41% | 245.74% |
|    | HUYJUG <sup>b</sup>   |  | Ni |                                                                                                                                   |                                                                                     |         |        |         |         |         |



|    |                      |  |    |                                                                                                                                                              |                                                                                                               |        |         |         |         |         |
|----|----------------------|--|----|--------------------------------------------------------------------------------------------------------------------------------------------------------------|---------------------------------------------------------------------------------------------------------------|--------|---------|---------|---------|---------|
| 19 | MUVJIX <sup>a</sup>  |  | Fe | <div><div>C<sub>9</sub>H<sub>6</sub>N<sub>12</sub></div><div>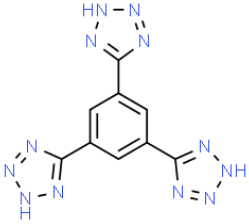</div></div>   | <div>the</div> <div></div>  | 14.78% | 26.19%  | 182.26% | 197.29% | 44.29%  |
|    | VEXYON <sup>†b</sup> |  | Cu |                                                                                                                                                              |                                                                                                               |        |         |         |         |         |
| 20 | HEBTEP <sup>a</sup>  |  | Zn | <div><div>C<sub>12</sub>H<sub>8</sub>O<sub>4</sub></div><div></div></div> | <div>lim</div> <div></div> | 67.05% | 102.80% | 952.58% | 644.99% | 223.63% |

|  |                     |  |    |                                                                                   |  |  |  |  |  |  |
|--|---------------------|--|----|-----------------------------------------------------------------------------------|--|--|--|--|--|--|
|  | SETFUT <sup>b</sup> |  | Cd | 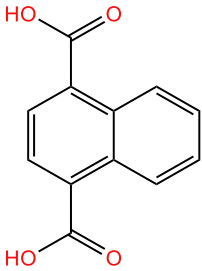 |  |  |  |  |  |  |
|--|---------------------|--|----|-----------------------------------------------------------------------------------|--|--|--|--|--|--|

<sup>a</sup> High-performance MOFs in the same group; <sup>b</sup> Poor performance MOFs in the same group.

## References

- 1 . A. K. Rappé; C. J. Casewit; K. S. Colwell; W. A. Goddard III; Skif., W. M. Uff a full periodic table force field for molecular mechanics and molecular dynamics simulations. *J. Am. Chem. Soc.* **1992**, *114*, 10024-10035.
- 2 . Potoff, J. J.; Siepmann, J. I. Vapor-liquid equilibria of mixtures containing alkanes, carbon dioxide, and nitrogen. *AIChE J.* **2001**, *47*, 1676-1682.
- 3 . Stoll, J.; Vrabec, J.; Hasse, H. Vapor-liquid equilibria of mixtures containing nitrogen, oxygen, carbon dioxide, and ethane. *AIChE J.* **2003**, *49*, 2187-2198.
- 4 . Martin MG, S. J. Transferable Potentials for Phase Equilibria. 1. United-Atom Description of n-Alkanes. *J. Phys. Chem. B* **1998**, *102*, 2569-2577.
- 5 . Shah, M. S.; Tsapatsis, M.; Siepmann, J. I. Development of the Transferable Potentials for Phase Equilibria Model for Hydrogen Sulfide. *J. Phys. Chem. B* **2015**, *119*, 7041-7052.
